# Supplementary material for: Cranberry (Vaccinium macrocarpon) Juice Precipitate Pigmentation Is Mainly Polymeric Colors and Has Limited Impact on Soluble Anthocyanin Loss
Source: MDPI journal article supplement (doi:10.3390/antiox10111788), 2021-11-09
Supplement: s1 [file s1]

**Supplemental Table S1.** Quantitated lower limits of detection (LOD) and quantitation (LOQ) of analytes in cranberry juice supernatant and precipitate extract and hydrolysate.

| compound                 | cranberry juice supernatant |                       | methanol extract and hydrolysate of juice precipitate |                       |
|--------------------------|-----------------------------|-----------------------|-------------------------------------------------------|-----------------------|
|                          | LOD ( $\mu\text{M}$ )       | LOQ ( $\mu\text{M}$ ) | LOD ( $\mu\text{M}$ )                                 | LOQ ( $\mu\text{M}$ ) |
| gallic acid              | 0.054                       | 0.16                  | 0.10                                                  | 0.32                  |
| protocatechuic acid      | 0.11                        | 0.35                  | 0.15                                                  | 0.46                  |
| vanillic acid            | 0.057                       | 0.17                  | 0.089                                                 | 0.27                  |
| cyanidin 3-O-galactoside | 0.1008                      | 0.31                  | 4.1                                                   | 13                    |
| cyanidin 3-O-glucoside   | 0.055                       | 0.17                  | 3.4                                                   | 10                    |
| cyanidin 3-O-arabinoside | 0.047                       | 0.14                  | 0.478                                                 | 1.4                   |
| peonidin 3-O-galactoside | 0.059                       | 0.18                  | 0.18                                                  | 0.53                  |
| peonidin 3-O-glucoside   | 0.060                       | 0.18                  | 0.73                                                  | 2.2                   |
| peonidin 3-O-arabinoside | 0.051                       | 0.16                  | 0.91                                                  | 2.8                   |
| cyanidin                 |                             |                       | 4.1                                                   | 12                    |
| peonidin                 |                             |                       | 0.17                                                  | 0.51                  |

**Supplemental Table S2.** Quantitated lower limits of detection (LOD) and quantitation (LOQ) of analytes in isolated cranberry juice anthocyanins, extract of precipitate of isolated anthocyanins, and hydrolysate of precipitate of isolated anthocyanins.

| compound                 | isolated anthocyanins and methanol extract<br>of precipitate of isolated anthocyanins |                       | hydrolysate of precipitate of<br>isolated anthocyanins |                       |
|--------------------------|---------------------------------------------------------------------------------------|-----------------------|--------------------------------------------------------|-----------------------|
|                          | LOD ( $\mu\text{M}$ )                                                                 | LOQ ( $\mu\text{M}$ ) | LOD ( $\mu\text{M}$ )                                  | LOQ ( $\mu\text{M}$ ) |
| gallic acid              | 0.078                                                                                 | 0.24                  | 0.13                                                   | 0.40                  |
| protocatechuic acid      | 0.13                                                                                  | 0.39                  | 0.86                                                   | 2.6                   |
| vanillic acid            | 0.11                                                                                  | 0.33                  | 0.22                                                   | 0.68                  |
| cyanidin 3-O-galactoside | 1.9                                                                                   | 5.6                   | 0.42                                                   | 1.3                   |
| cyanidin 3-O-glucoside   | 2.2                                                                                   | 6.6                   | 0.38                                                   | 1.1                   |
| cyanidin 3-O-arabinoside | 0.79                                                                                  | 2.4                   | 0.54                                                   | 1.6                   |
| peonidin 3-O-galactoside | 1.1                                                                                   | 3.3                   | 0.71                                                   | 2.1                   |
| peonidin 3-O-glucoside   | 1.4                                                                                   | 4.1                   | 0.67                                                   | 2.0                   |
| peonidin 3-O-arabinoside | 1.4                                                                                   | 4.3                   | 1.0                                                    | 3.1                   |
| cyanidin                 |                                                                                       |                       | 0.44                                                   | 1.3                   |
| peonidin                 |                                                                                       |                       | 0.23                                                   | 0.70                  |

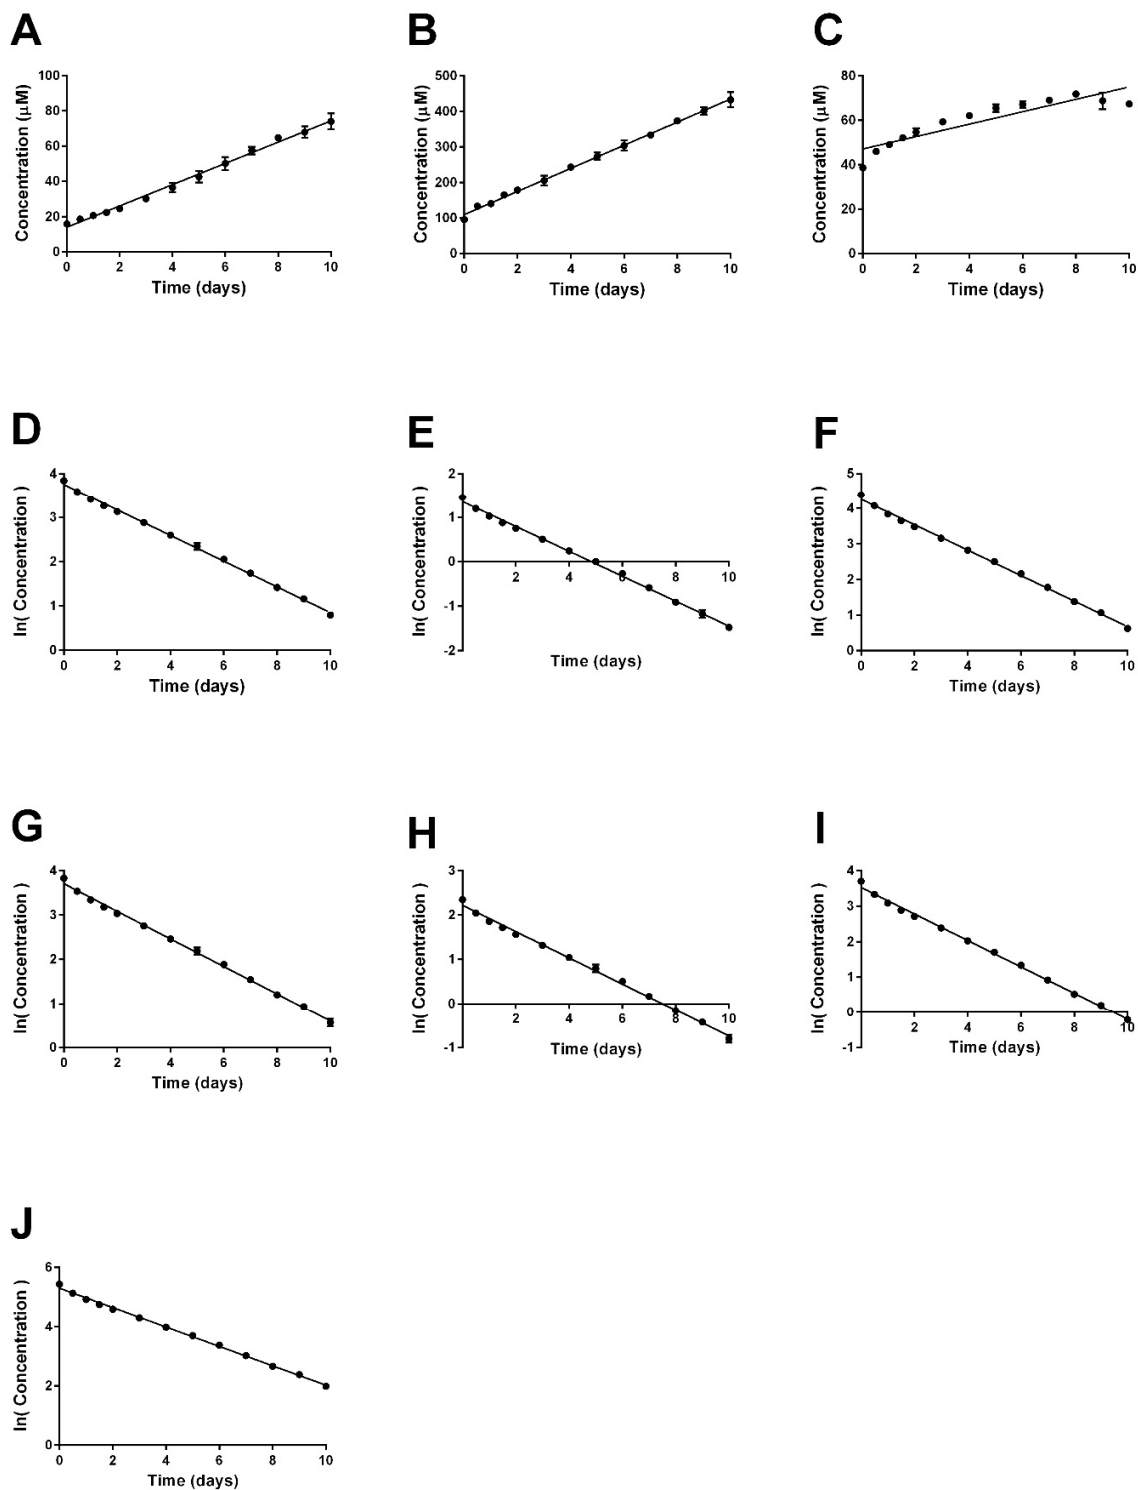

**Supplemental Figure S1.** Concentration of (A) gallic acid, (B) protocatechuic acid, (C) vanillic acid; natural logarithm of concentration of (D) cyanidin 3-O-galactoside, (E) cyanidin 3-O-glucoside, (F) cyanidin 3-O-arabinoside, (G) peonidin 3-O-galactoside, (H) peonidin 3-O-glucoside, (I) peonidin 3-O-

arabinoside; and (J) the natural logarithm of the sum of concentration of the six aforementioned anthocyanins in cranberry juice supernatant as measured by HPLC during accelerated aging at 50 °C. All are shown with modeled linear least square regressions for pseudo-zeroth or -first order kinetics: gallic acid,  $Y = (6.0 \pm 0.1) X + (14.0 \pm 0.6)$  ( $R^2 = 0.9838$ , non-zero slope  $p < 0.0001$ ); protocatechuic acid,  $Y = (32.5 \pm 0.5) X + (110. \pm 2)$  ( $R^2 = 0.9905$ , non-zero slope  $p < 0.0001$ ); vanillic acid,  $Y = (2.8 \pm 0.2) X + (47 \pm 1)$  ( $R^2 = 0.8101$ , non-zero slope  $p < 0.0001$ ); cyanidin 3-O-galactoside,  $Y = (-0.290 \pm 0.002) X + (3.75 \pm 0.01)$  ( $R^2 = 0.9965$ , non-zero slope  $p < 0.0001$ ); cyanidin 3-O-glucoside,  $Y = (-0.281 \pm 0.002) X + (1.36 \pm 0.01)$  ( $R^2 = 0.9963$ , non-zero slope  $p < 0.0001$ ); cyanidin 3-O-arabinoside,  $Y = (-0.359 \pm 0.003) X + (4.26 \pm 0.02)$  ( $R^2 = 0.9965$ , non-zero slope  $p < 0.0001$ ); peonidin 3-O-galactoside,  $Y = (-0.311 \pm 0.003) X + (3.71 \pm 0.01)$  ( $R^2 = 0.9961$ , non-zero slope  $p < 0.0001$ ); peonidin 3-O-glucoside,  $Y = (-0.296 \pm 0.003) X + (2.22 \pm 0.02)$  ( $R^2 = 0.9948$ , non-zero slope  $p < 0.0001$ ); peonidin 3-O-arabinoside,  $Y = (-0.373 \pm 0.003) X + (3.53 \pm 0.02)$  ( $R^2 = 0.9958$ , non-zero slope  $p < 0.0001$ ); and sum of anthocyanins by HPLC,  $Y = (-0.327 \pm 0.003) X + (5.30 \pm 0.02)$  ( $R^2 = 0.9962$ , non-zero slope  $p < 0.0001$ ).

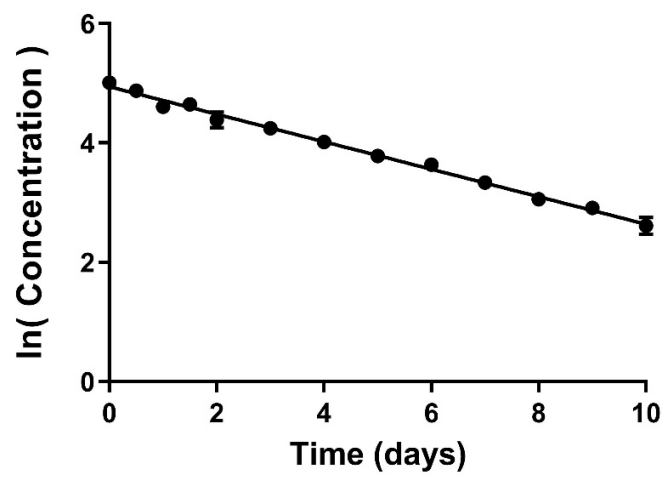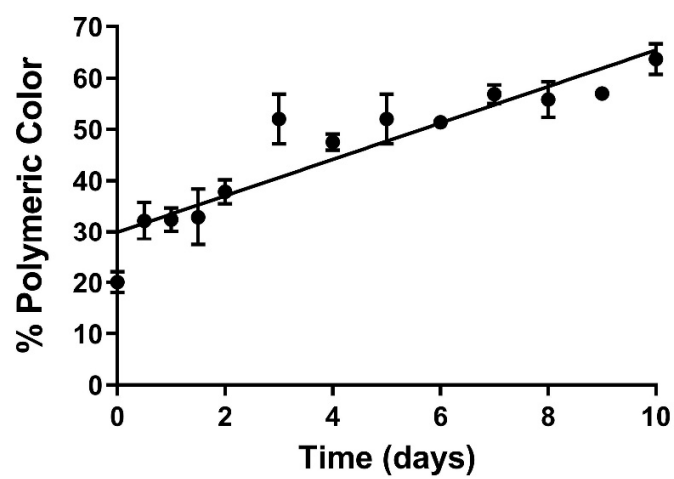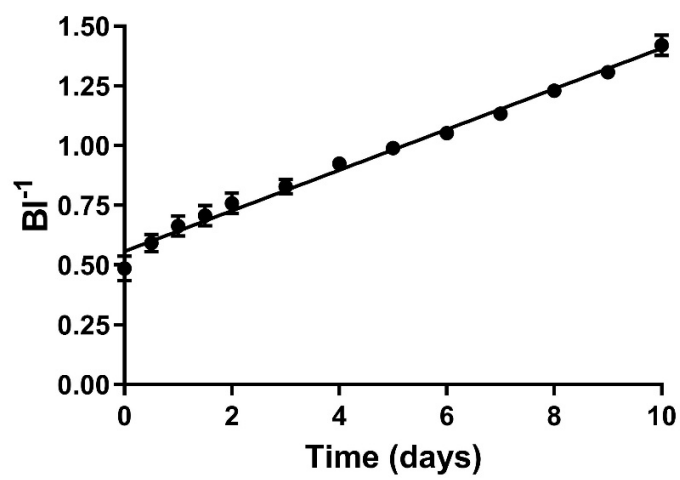

**Supplemental Figure S2.** (A) Natural logarithm of total anthocyanin content (MA) as measured by the pH differential method, (B) percent polymeric color (%PC), and (C) the inverse of browning index (BI) of cranberry juice supernatant during accelerated aging at 50 °C. All are shown with modeled linear least square regressions for pseudo-zeroth, -first, or -second order kinetics: MA,  $Y = (-0.231 \pm 0.004) X + (4.94 \pm 0.02)$  ( $R^2 = 0.9842$ , non-zero slope  $p < 0.0001$ ); %PC,  $Y = (3.5 \pm 0.2) X + (30. \pm 1)$  ( $R^2 = 0.8102$ , non-zero slope  $p < 0.0001$ ); and BI,  $Y = (0.085 \pm 0.002) X + (0.557 \pm 0.009)$  ( $R^2 = 0.9803$ , non-zero slope  $p < 0.0001$ ).

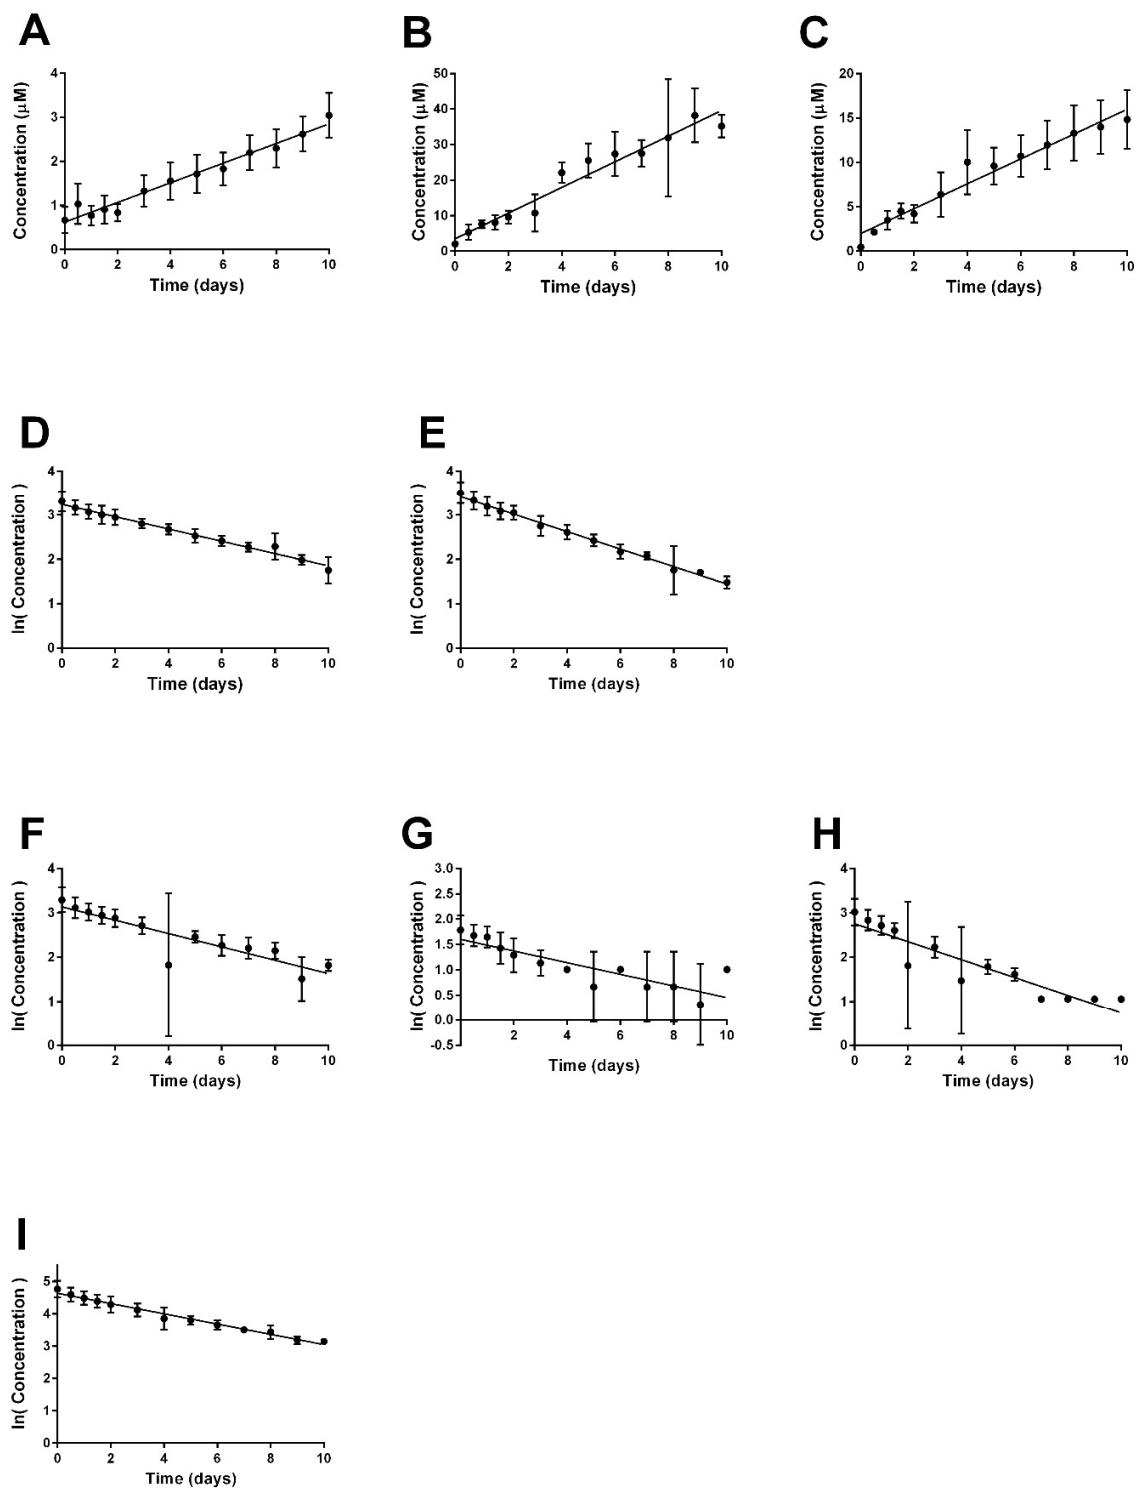

**Supplemental Figure S3.** Concentration of (A) gallic acid, (B) protocatechuic acid, (C) vanillic acid; natural logarithm of concentration of (D) cyanidin 3-O-galactoside, (E) cyanidin 3-O-arabinoside, (F) peonidin 3-O-galactoside, (G) peonidin 3-O-glucoside, (H) peonidin 3-O-arabinoside; and (I) the natural

logarithm of the sum of concentration cyanidin and peonidin 3-O-galactoside, -glucoside, and -arabinoside of isolated cranberry juice anthocyanins as measured by HPLC during accelerated aging at 50 °C. All are shown with modeled linear least square regressions for pseudo-zeroth or -first order kinetics: gallic acid,  $Y = (0.22 \pm 0.02) X + (0.62 \pm 0.08)$  ( $R^2 = 0.8070$ , non-zero slope  $p < 0.0001$ ); protocatechuic acid,  $Y = (3.6 \pm 0.3) X + (3 \pm 1)$  ( $R^2 = 0.8058$ , non-zero slope  $p < 0.0001$ ); vanillic acid,  $Y = (1.4 \pm 0.1) X + (2.0 \pm 0.5)$  ( $R^2 = 0.8091$ , non-zero slope  $p < 0.0001$ ); cyanidin 3-O-galactoside,  $Y = (-0.139 \pm 0.007) X + (3.24 \pm 0.04)$  ( $R^2 = 0.8747$ , non-zero slope  $p < 0.0001$ ); cyanidin 3-O-arabinoside,  $Y = (-0.197 \pm 0.009) X + (3.42 \pm 0.05)$  ( $R^2 = 0.9104$ , non-zero slope  $p < 0.0001$ ); peonidin 3-O-galactoside,  $Y = (-0.15 \pm 0.02) X + (3.1 \pm 0.1)$  ( $R^2 = 0.4920$ , non-zero slope  $p < 0.0001$ ); peonidin 3-O-glucoside,  $Y = (-0.12 \pm 0.02) X + (1.6 \pm 0.1)$  ( $R^2 = 0.4151$ , non-zero slope  $p < 0.0001$ ); peonidin 3-O-arabinoside,  $Y = (-0.20 \pm 0.02) X + (2.8 \pm 0.1)$  ( $R^2 = 0.5978$ , non-zero slope  $p < 0.0001$ ); and sum of anthocyanins by HPLC,  $Y = (-0.159 \pm 0.008) X + (4.63 \pm 0.04)$  ( $R^2 = 0.8841$ , non-zero slope  $p < 0.0001$ ).



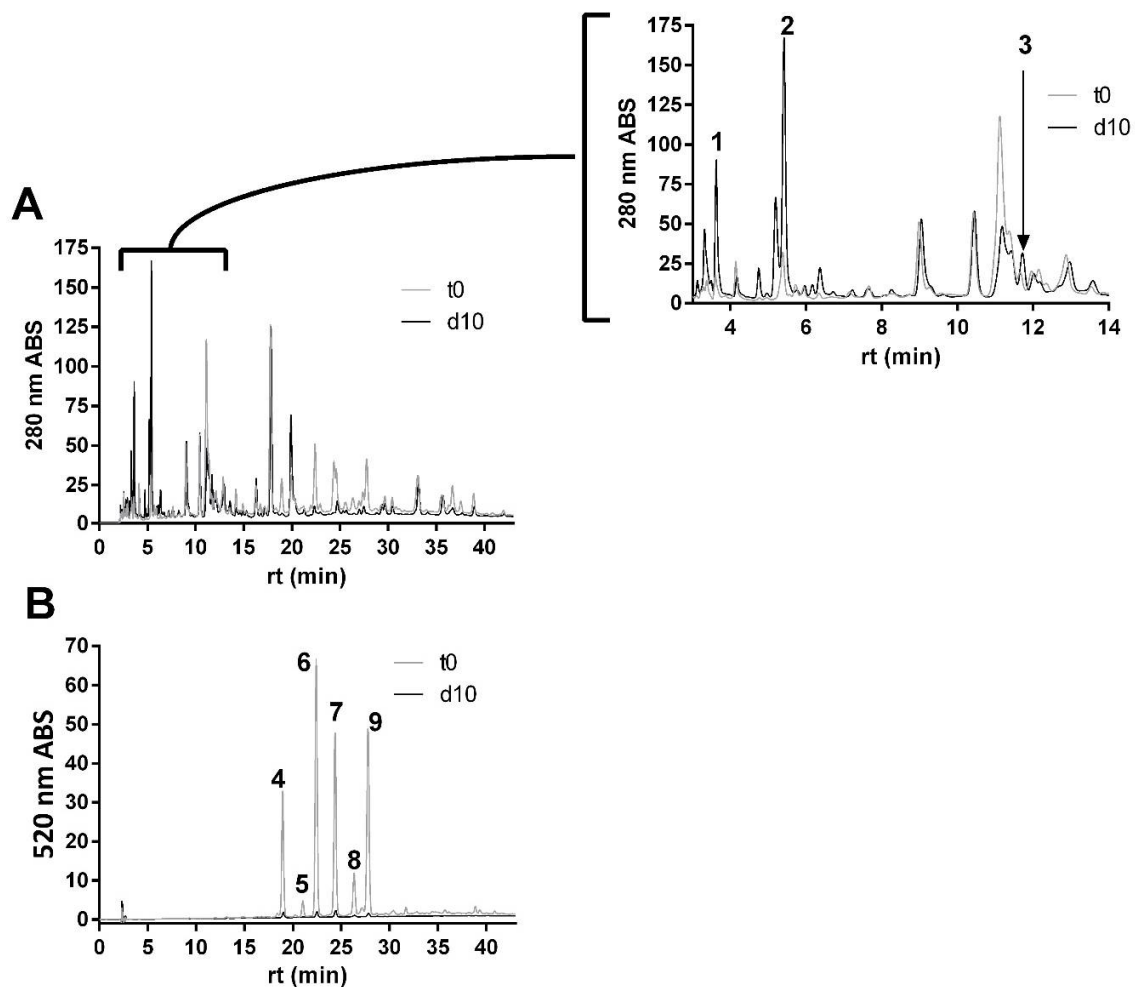

**Supplemental Figure S4.** Example RP-HPLC chromatograms of freshly prepared juice supernatant (t0) and juice supernatant after 10 days at 50 °C (d10) (A) at 280 nm and (B) 520 nm. Analytes corresponding to numbered peaks are identified in **Table S3**.

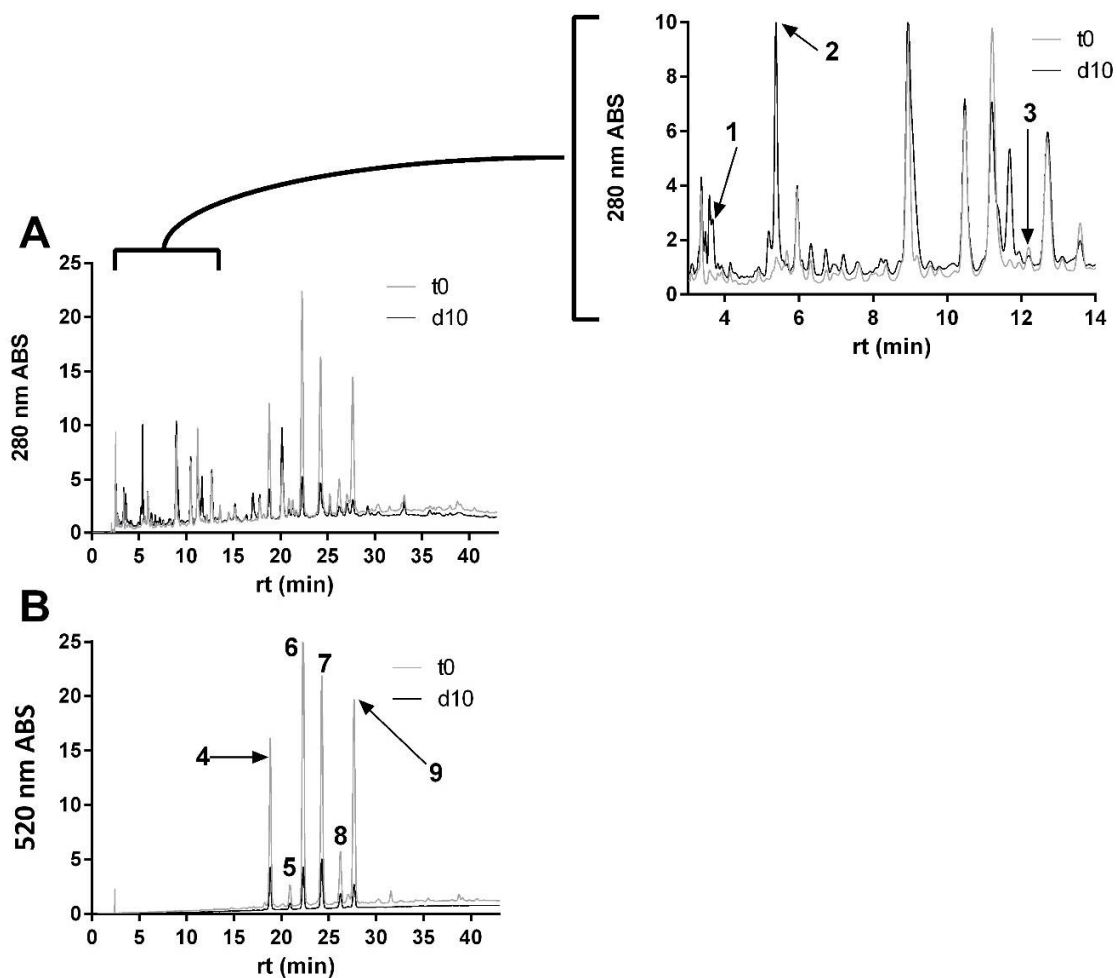

**Supplemental Figure S5.** Example RP-HPLC chromatograms of isolated cranberry juice anthocyanins (t0) and isolated cranberry juice anthocyanins after 10 days at 50 °C (d10) (A) at 280 nm and (B) 520 nm. Analytes corresponding to numbered peaks are identified in **Table S3**.

**Supplemental Table S3.** Peak numbers in example chromatograms and retention time of analytes in HPLC analyses

| peak | compound                       | retention time (min) |
|------|--------------------------------|----------------------|
| 1    | gallic acid                    | 3.64                 |
| 2    | protocatechuic acid            | 5.49                 |
| 3    | vanillic acid                  | 11.99                |
| 4    | cyanidin 3-O-galactoside       | 19.18                |
| 5    | cyanidin 3-O-glucoside         | 21.25                |
| 6    | cyanidin 3-O-arabinoside       | 22.67                |
| 7    | peonidin 3-O-galactoside       | 24.62                |
| 8    | peonidin 3-O-glucoside         | 26.60                |
| 9    | peonidin 3-O-arabinoside       | 28.04                |
| 10   | cyanidin                       | 32.63                |
| 11   | <i>tert</i> -butylhydroquinone | 34.05                |
| 12   | peonidin                       | 39.76                |

**Supplemental Table S4.** Percent of each anthocyanin or class of anthocyanins relative to total measured anthocyanin concentration in cranberry juice supernatant and in soluble isolated cranberry juice anthocyanins.

| anthocyanin(s)            | percent of anthocyanin(s) in cranberry juice supernatant | percent of anthocyanin(s) in isolated cranberry juice anthocyanins <sup>a</sup> | adjusted P values <sup>b</sup> |
|---------------------------|----------------------------------------------------------|---------------------------------------------------------------------------------|--------------------------------|
| cyanidin 3-O-galactoside* | 20.6 ± 0.6%                                              | 23 ± 1%                                                                         | 0.036883                       |
| cyanidin 3-O-glucoside    | 2.39 ± 0.04%                                             | < 5.5%                                                                          | 0.474760                       |
| cyanidin 3-O-arabinoside* | 35.1 ± 0.3%                                              | 28.4 ± 0.5%                                                                     | 0.000028                       |
| peonidin 3-O-galactoside* | 18.2 ± 0.2%                                              | 22.9 ± 0.7%                                                                     | 0.005061                       |
| peonidin 3-O-glucoside    | 5.583 ± 0.007%                                           | 5.1 ± 0.3%                                                                      | 0.177654                       |
| peonidin 3-O-arabinoside  | 18.1 ± 0.1%                                              | 17 ± 1%                                                                         | 0.467051                       |
| cyanidin-glycosides (sum) | 58.2 ± 0.3%                                              | 55 ± 2%                                                                         | 0.170502                       |
| peonidin-glycosides (sum) | 41.8 ± 0.3%                                              | 45 ± 2%                                                                         | 0.170502                       |

Data are mean ± standard deviation of n = 4 experiments.

<sup>a</sup>For anthocyanins where the concentration was below the quantification limits, values are reported as < LOQ/sum of anthocyanin concentration. Detection and quantification limits are included in **Tables S1** and **S2**.

<sup>b</sup>Percent compositions of anthocyanins of cranberry juice supernatant isolated cranberry juice anthocyanins were compared using an unpaired t test with Welch's correction and Holm-Sidak method to account for multiple comparisons. Reported P values were adjusted to account for multiple corrections. The three anthocyanins indicated (\*) had statistically different percent composition in the cranberry juice supernatant and in the isolated cranberry juice anthocyanins.

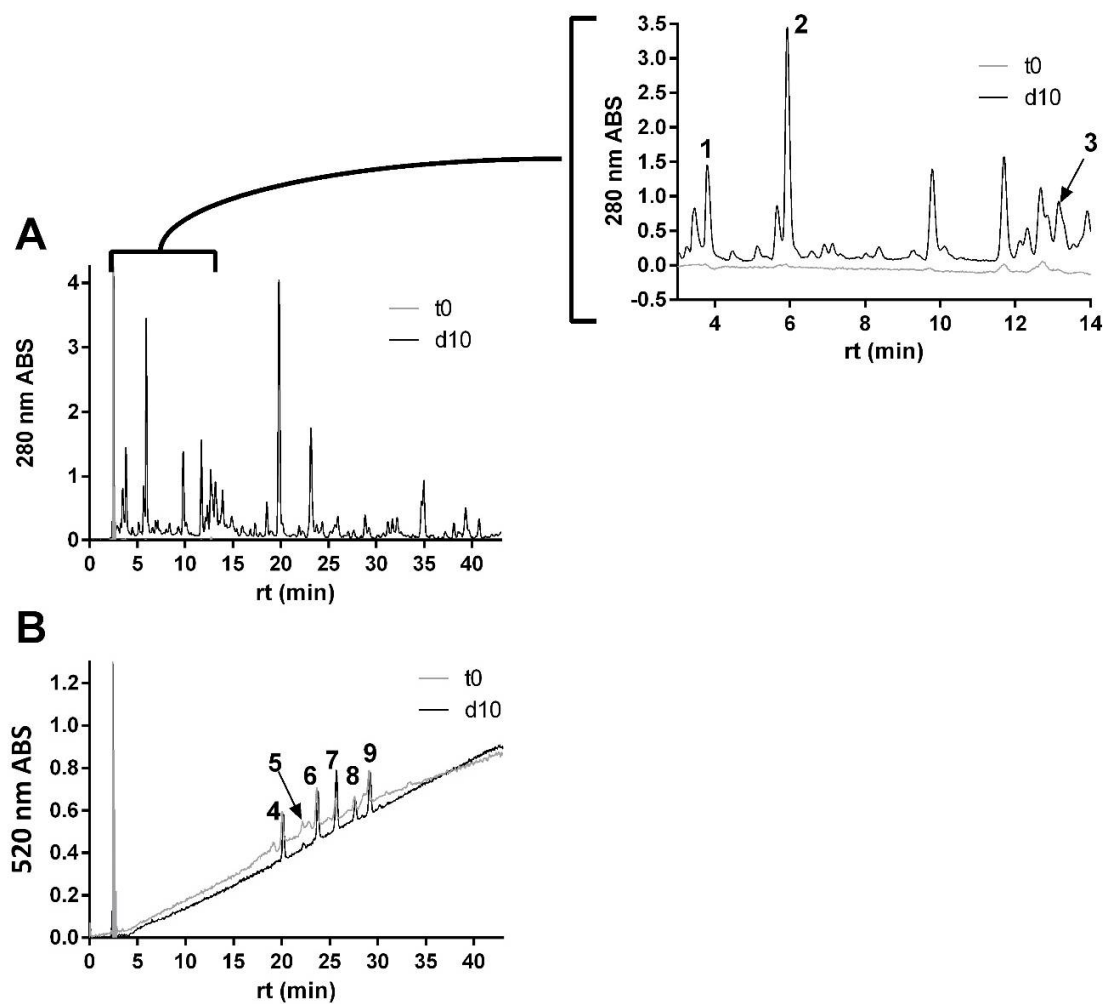

**Supplemental Figure S6.** Example RP-HPLC chromatograms of methanol extract of precipitate from freshly prepared cranberry juice (t0) and methanol extract of precipitate from cranberry juice after 10 days at 50 °C (d10) (A) at 280 nm and (B) 520 nm. Analytes corresponding to numbered peaks are identified in **Table S3**.

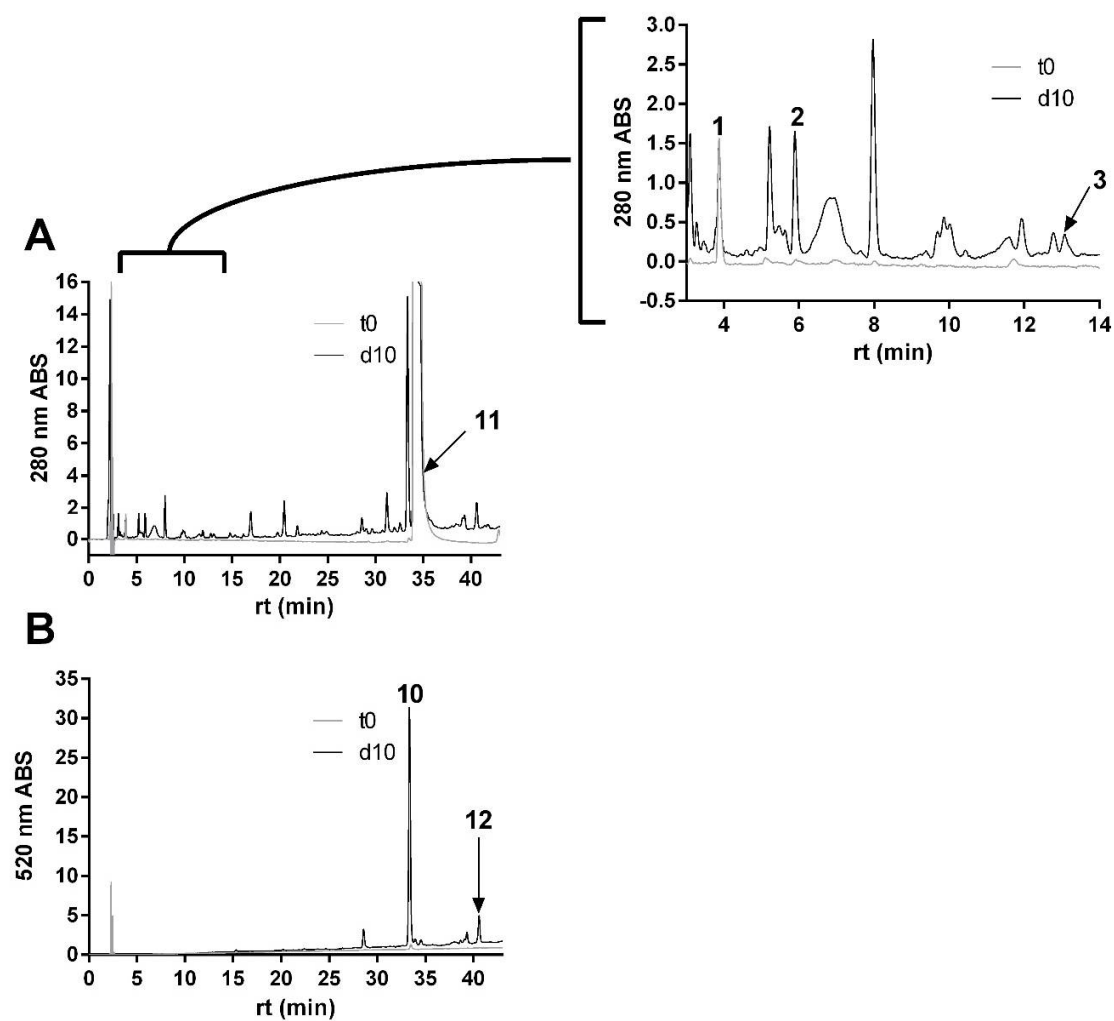

**Supplemental Figure S7.** Example RP-HPLC chromatograms of hydrolysate of precipitate from freshly prepared cranberry juice (t0) and hydrolysate of precipitate from cranberry juice after 10 days at 50 °C (d10) (A) at 280 nm and (B) 520 nm. Analytes corresponding to numbered peaks are identified in **Table S3**.

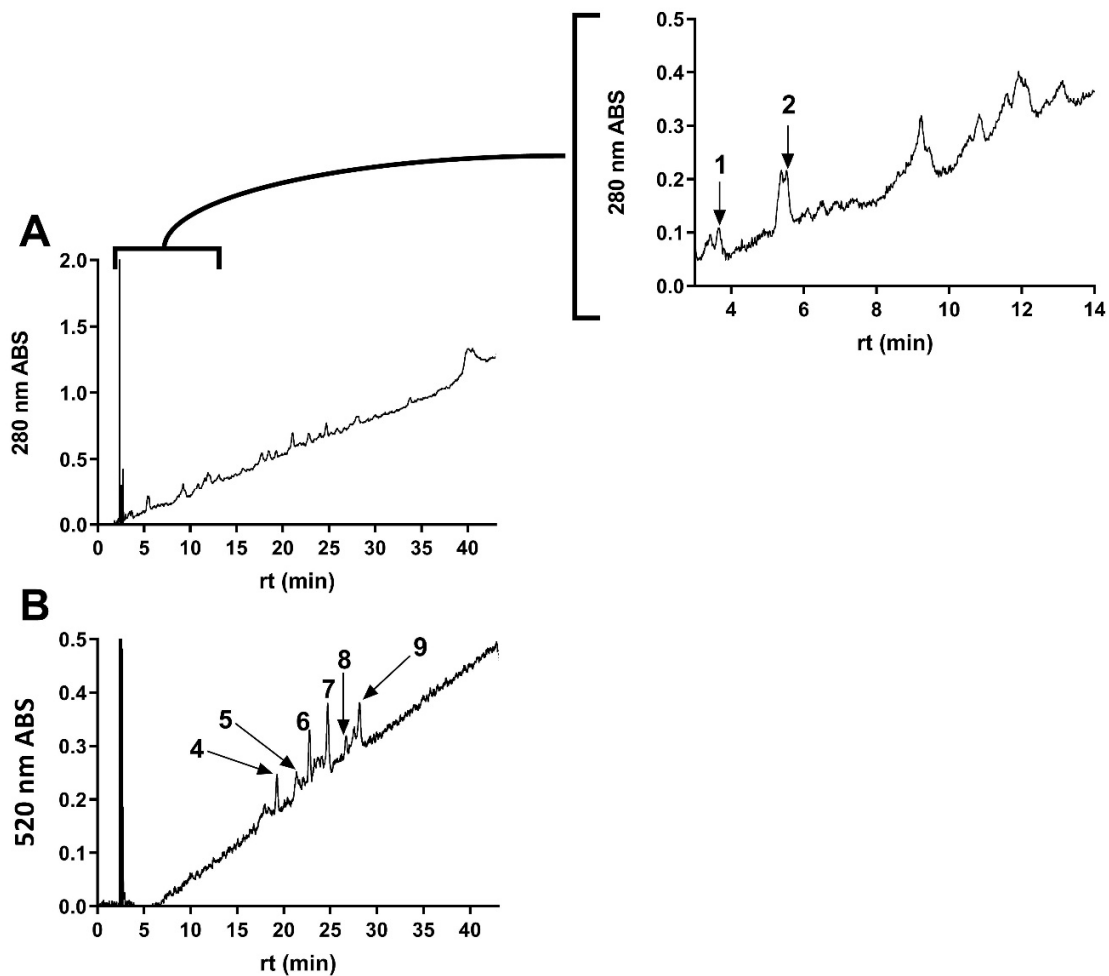

**Supplemental Figure S8.** Example RP-HPLC chromatograms of methanol extract of precipitate from isolated cranberry juice anthocyanins after 10 days at 50 °C (A) at 280 nm and (B) 520 nm. Analytes corresponding to numbered peaks are identified in Table S3.

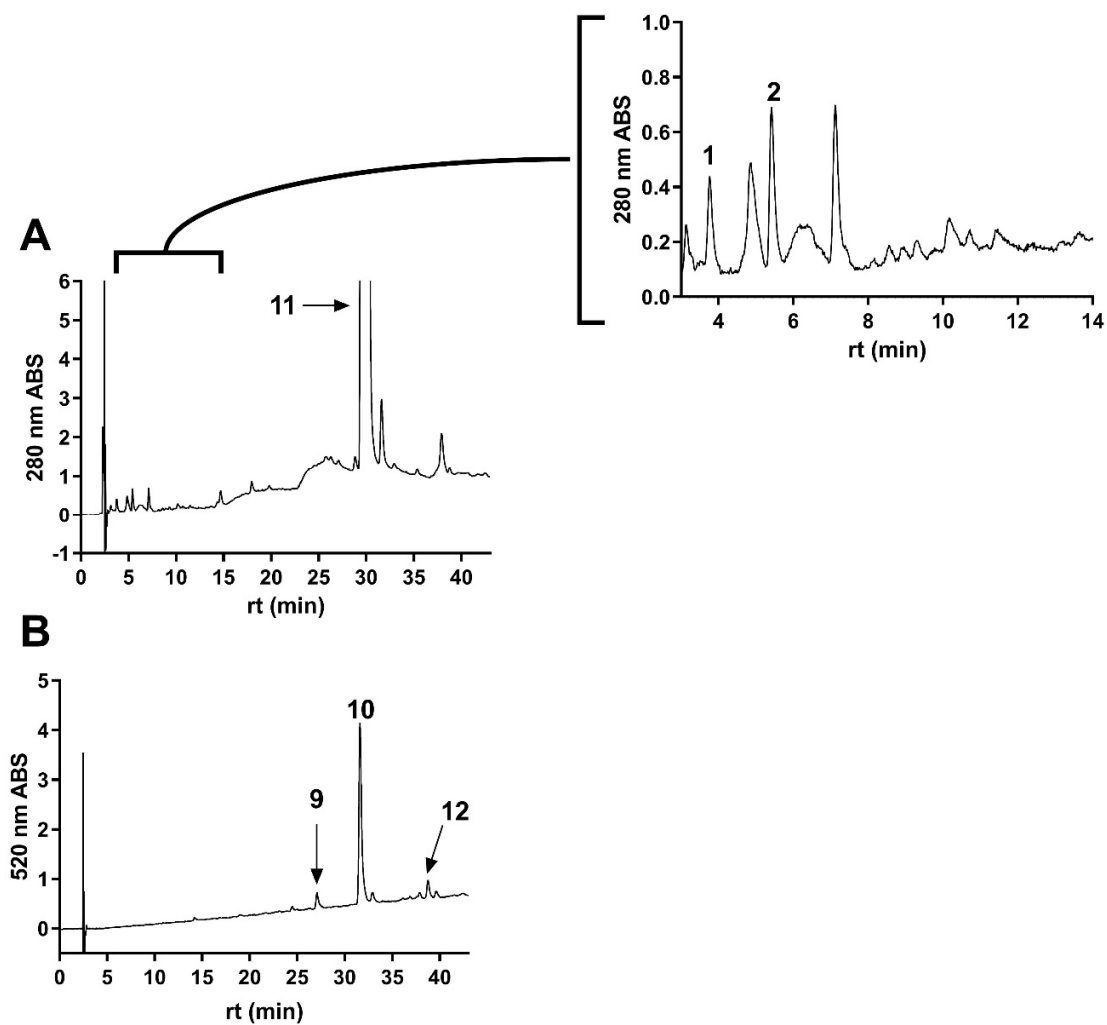

**Supplemental Figure S9.** Example RP-HPLC chromatograms of hydrolysate of precipitate from isolated cranberry juice anthocyanins after 10 days at 50 °C (A) at 280 nm and (B) 520 nm. Analytes corresponding to numbered peaks are identified in **Table S3**.



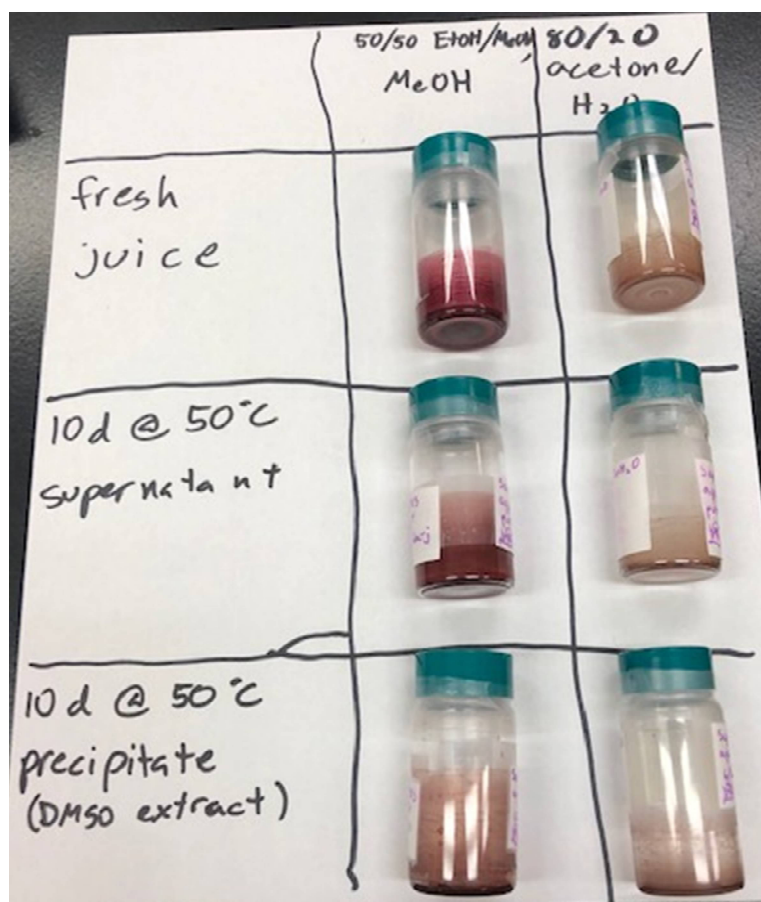

**Supplemental Figure S10.** Photograph of pigmented samples analyzed via MALDI-TOF.

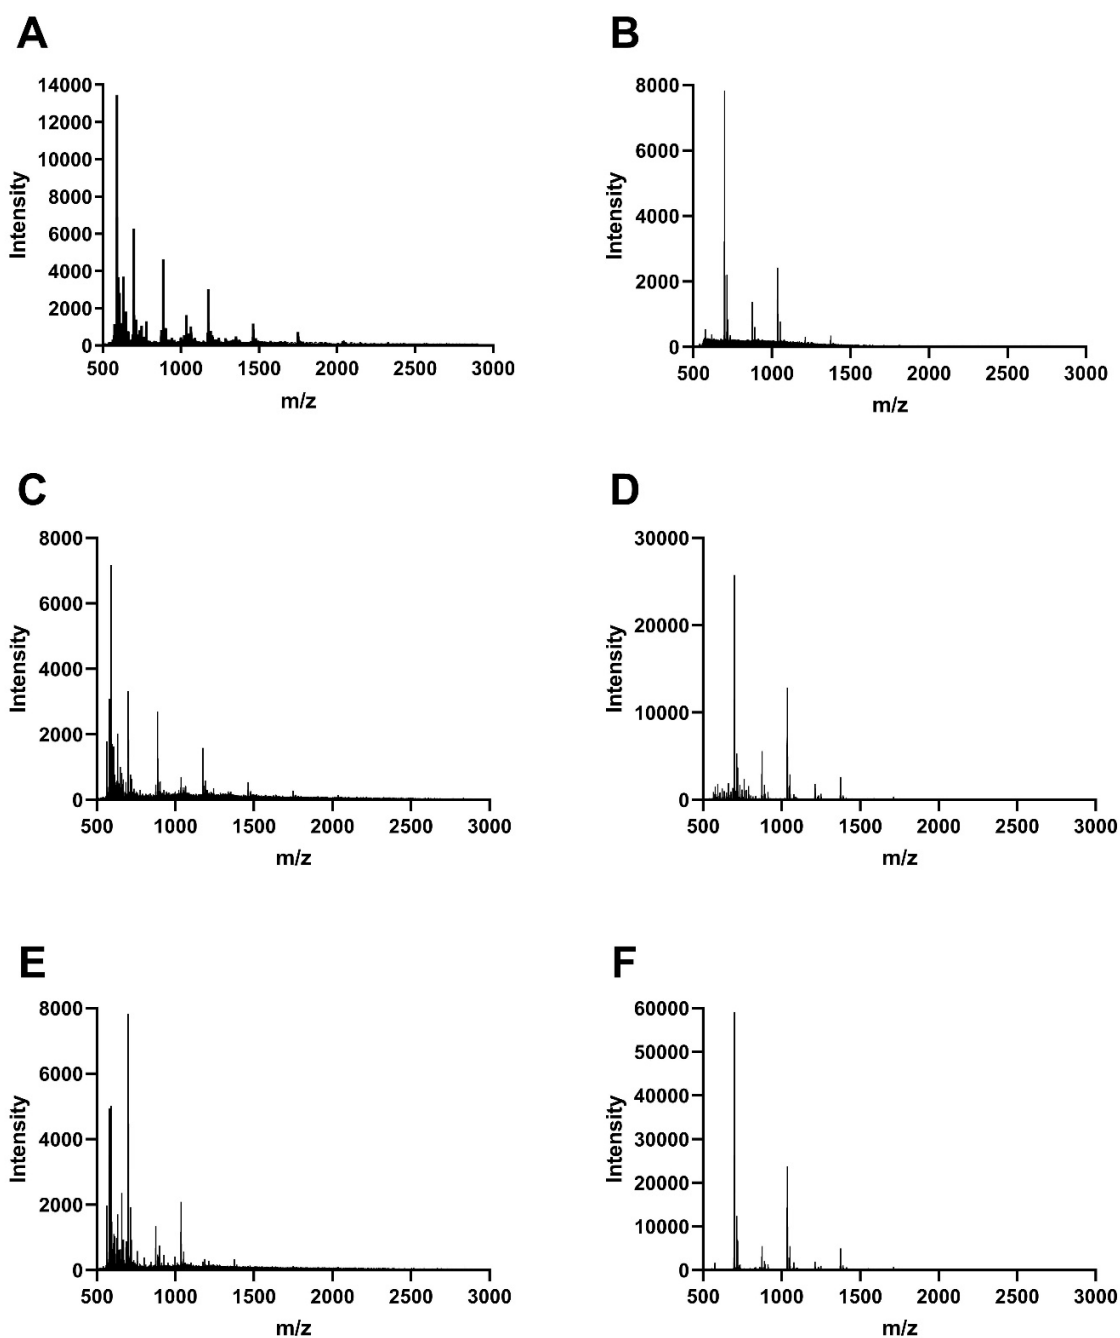

**Supplemental Figure S11.** MALDI-TOF mass spectra of freshly prepared juice samples and samples of juice after 10 days accelerated aging at 50 °C all purified by Sephadex LH-20 chromatography. (A) Freshly prepared juice, combined eluates of 50/50 ethanol/methanol and methanol. (B) Freshly prepared juice, eluate of 80/20 acetone/water. (C) Supernatant of juice after accelerated aging, combined eluates of 50/50 ethanol/methanol and methanol. (D) Supernatant of juice after accelerated aging, eluate of 80/20 acetone/water. (E) Precipitate of juice after accelerated aging, combined eluates of 50/50

ethanol/methanol and methanol. (F) Precipitate of juice after accelerated aging, eluate of 80/20 acetone/water.

**Supplemental Table S5.** Analytical parameters of MALDI-TOF peaks identified as anthocyanin-procyanidins of cranberry juice, freshly prepared or after 10 days accelerated aging at 50 °C.

| Sephadex fraction         | anthocyanin        | # (epi)catechin units | #A type linkages | anthocyanin-procyanidin connection | molecular formula | calculated mass | measured mass | intensity |
|---------------------------|--------------------|-----------------------|------------------|------------------------------------|-------------------|-----------------|---------------|-----------|
| <b>unaged whole juice</b> |                    |                       |                  |                                    |                   |                 |               |           |
| alcohols                  | cyanidin-hexoside  | 1                     | 0                | ethylene cross-linked              | C38H37O17         | 765.2025        | 765.197       | 347       |
|                           |                    | 2                     | 1                | directly bonded                    | C51H43O23         | 1023.219        | 1023.2165     | 324       |
|                           |                    | 2                     | 1                | ethylene cross-linked              | C53H47O23         | 1051.2503       | 1051.222      | 411       |
|                           |                    | 3                     | 1                | ethylene cross-linked              | C68H59O29         | 1339.3137       | 1339.2453     | 193       |
|                           |                    | 3                     | 2                | directly bonded                    | C66H53O29         | 1309.2667       | 1309.2329     | 183       |
|                           |                    | 3                     | 2                | ethylene cross-linked              | C68H57O29         | 1337.298        | 1337.2548     | 261       |
|                           | cyanidin-pentoside | 4                     | 2                | ethylene cross-linked              | C83H69O35         | 1625.3614       | 1625.2645     | 125       |
|                           |                    | 1                     | 0                | ethylene cross-linked              | C37H35O16         | 735.192         | 735.1898      | 645       |
|                           |                    | 2                     | 0                | ethylene cross-linked              | C52H47O22         | 1023.2553       | 1023.2165     | 324       |
|                           |                    | 2                     | 1                | ethylene cross-linked              | C52H45O22         | 1021.2397       | 1021.2111     | 405       |
|                           |                    | 3                     | 1                | ethylene cross-linked              | C67H57O28         | 1309.3031       | 1309.2329     | 183       |
|                           |                    | 1                     | 0                | directly bonded                    | C37H35O17         | 751.1869        | 751.1907      | 204       |
|                           | peonidin-hexoside  | 1                     | 0                | ethylene cross-linked              | C39H39O17         | 779.2182        | 779.2144      | 1019      |
|                           |                    | 2                     | 0                | directly bonded                    | C52H47O23         | 1039.2503       | 1039.1715     | 232       |
|                           |                    | 2                     | 0                | ethylene cross-linked              | C54H51O23         | 1067.2816       | 1067.2345     | 415       |
|                           |                    | 2                     | 1                | directly bonded                    | C52H45O23         | 1037.2346       | 1037.0543     | 1200      |
|                           |                    | 2                     | 1                | directly bonded                    | C52H45O23         | 1037.2346       | 1037.0543     | 1200      |
|                           |                    | 2                     | 1                | ethylene cross-linked              | C54H49O23         | 1065.2659       | 1065.226      | 762       |
|                           |                    | 2                     | 1                | ethylene cross-linked              | C54H49O23         | 1065.2659       | 1065.226      | 762       |
|                           |                    | 3                     | 0                | ethylene cross-linked              | C69H63O29         | 1355.345        | 1355.2495     | 182       |
|                           |                    | 3                     | 1                | ethylene cross-linked              | C69H61O29         | 1353.3293       | 1353.2463     | 359       |
|                           |                    | 3                     | 1                | ethylene cross-linked              | C69H61O29         | 1353.3293       | 1353.2463     | 359       |
|                           |                    | 3                     | 2                | directly bonded                    | C67H55O29         | 1323.2824       | 1323.2432     | 190       |
|                           |                    | 3                     | 2                | ethylene cross-linked              | C69H59O29         | 1351.3137       | 1351.254      | 259       |
|                           |                    | 4                     | 1                | ethylene cross-linked              | C84H73O35         | 1641.3927       | 1641.2569     | 141       |
|                           |                    | 4                     | 1                | ethylene cross-linked              | C84H73O35         | 1641.3927       | 1641.2569     | 141       |
|                           |                    | 4                     | 2                | ethylene cross-linked              | C84H71O35         | 1639.377        | 1639.2758     | 136       |
|                           | peonidin-pentoside | 1                     | 0                | ethylene cross-linked              | C38H37O16         | 749.2076        | 749.207       | 775       |
|                           |                    | 3                     | 1                | ethylene cross-linked              | C68H59O28         | 1323.3187       | 1323.2432     | 190       |

|                        |                    |   |   |                       |           |           |           |       |
|------------------------|--------------------|---|---|-----------------------|-----------|-----------|-----------|-------|
| acetone/water          | cyanidin-hexoside  | 2 | 0 | ethylene cross-linked | C53H49O23 | 1053.266  | 1053.084  | 589   |
|                        | cyanidin-pentoside | 1 | 0 | ethylene cross-linked | C37H35O16 | 735.192   | 735.2466  | 285   |
|                        | peonidin-hexoside  | 1 | 0 | directly bonded       | C37H35O17 | 751.1869  | 751.2423  | 158   |
|                        |                    | 2 | 1 | directly bonded       | C52H45O23 | 1037.235  | 1037.125  | 1945  |
|                        | peonidin-pentoside | 2 | 0 | ethylene cross-linked | C53H49O22 | 1037.271  | 1037.125  | 1945  |
|                        |                    | 2 | 1 | ethylene cross-linked | C53H47O22 | 1035.255  | 1035.172  | 219   |
| aged juice supernatant |                    |   |   |                       |           |           |           |       |
| alcohols               | cyanidin-hexoside  | 2 | 1 | ethylene cross-linked | C53H47O23 | 1051.25   | 1051.266  | 223   |
|                        |                    | 3 | 1 | ethylene cross-linked | C68H59O29 | 1339.314  | 1339.305  | 136   |
|                        |                    | 3 | 2 | ethylene cross-linked | C68H57O29 | 1337.298  | 1337.322  | 193   |
|                        | cyanidin-pentoside | 2 | 1 | ethylene cross-linked | C52H45O22 | 1021.24   | 1021.257  | 218   |
|                        | peonidin-hexoside  | 2 | 1 | directly bonded       | C52H45O23 | 1037.235  | 1037.126  | 553   |
|                        |                    | 2 | 1 | ethylene cross-linked | C54H49O23 | 1065.266  | 1065.276  | 311   |
|                        |                    | 3 | 1 | ethylene cross-linked | C69H61O29 | 1353.329  | 1353.308  | 172   |
|                        |                    | 3 | 2 | ethylene cross-linked | C69H59O29 | 1351.314  | 1351.294  | 197   |
|                        | peonidin-pentoside | 2 | 0 | ethylene cross-linked | C53H49O22 | 1037.271  | 1037.126  | 553   |
|                        |                    | 2 | 1 | ethylene cross-linked | C53H47O22 | 1035.255  | 1035.256  | 249   |
| acetone/water          | cyanidin-hexoside  | 2 | 0 | ethylene cross-linked | C53H49O23 | 1053.2659 | 1053.1082 | 2332  |
|                        | cyanidin-pentoside | 1 | 0 | ethylene cross-linked | C37H35O16 | 735.192   | 735.3745  | 551   |
|                        | peonidin-hexoside  | 2 | 0 | ethylene cross-linked | C54H51O23 | 1067.2816 | 1067.1025 | 110   |
|                        |                    | 2 | 1 | directly bonded       | C52H45O23 | 1037.2346 | 1037.1464 | 10458 |
|                        | peonidin-pentoside | 2 | 0 | ethylene cross-linked | C53H49O22 | 1037.271  | 1037.1464 | 10458 |
|                        |                    | 2 | 1 | ethylene cross-linked | C53H47O22 | 1035.2553 | 1035.146  | 1259  |
| aged juice precipitate |                    |   |   |                       |           |           |           |       |
| alcohols               | cyanidin-hexoside  | 2 | 0 | ethylene cross-linked | C53H49O23 | 1053.2659 | 1053.0703 | 436   |
|                        | peonidin-hexoside  | 2 | 1 | directly bonded       | C52H45O23 | 1037.2346 | 1037.1024 | 1686  |
|                        | peonidin-pentoside | 2 | 0 | ethylene cross-linked | C53H49O22 | 1037.271  | 1037.1024 | 1686  |
|                        |                    | 2 | 1 | ethylene cross-linked | C53H47O22 | 1035.2553 | 1035.1761 | 123   |
| acetone/water          | cyanidin-hexoside  | 2 | 1 | ethylene cross-linked | C53H47O23 | 1051.2503 | 1051.0608 | 618   |
|                        | cyanidin-pentoside | 1 | 0 | ethylene cross-linked | C37H35O16 | 735.192   | 735.2648  | 1256  |
|                        | peonidin-hexoside  | 2 | 1 | directly bonded       | C52H45O23 | 1037.2346 | 1037.0961 | 20547 |
|                        | peonidin-pentoside | 2 | 0 | ethylene cross-linked | C53H49O22 | 1037.271  | 1037.0961 | 20547 |
|                        |                    | 2 | 1 | ethylene cross-linked | C53H47O22 | 1035.2553 | 1035.0979 | 2663  |

**Supplemental Table S6.** Intensities by constituent anthocyanidin, constituent glycoside, or constituent anthocyanin-proanthocyanidin linkage as percent of total intensity of tentatively identified anthocyanin-proanthocyanidin MALDI-TOF peaks within each analyzed Sephadex fraction

| juice fraction         | Sephadex fraction | percent of anthocyanin-proanthocyanidins with constituent cyanidin/peonidin | percent of anthocyanin-proanthocyanidins with constituent pentoside/hexoside | percent of anthocyanin-proanthocyanidins with/without ethylene bridge between anthocyanin and proanthocyanidin |
|------------------------|-------------------|-----------------------------------------------------------------------------|------------------------------------------------------------------------------|----------------------------------------------------------------------------------------------------------------|
| unaged whole juice     | alcohols          | 28/72                                                                       | 21/79                                                                        | 70/30                                                                                                          |
|                        | acetone/water     | 17/83                                                                       | 48/52                                                                        | 59/41                                                                                                          |
| aged juice supernatant | alcohols          | 27/73                                                                       | 36/64                                                                        | 80/20                                                                                                          |
|                        | acetone/water     | 11/89                                                                       | 49/51                                                                        | 58/42                                                                                                          |
| aged juice precipitate | alcohols          | 11/89                                                                       | 46/54                                                                        | 57/43                                                                                                          |
|                        | acetone/water     | 4/96                                                                        | 56/44                                                                        | 57/43                                                                                                          |
